# Supplementary material for: Validation of Activity Tracking Procedures in Elderly Patients after Operative Treatment of Proximal Femur Fractures
Source: Rehabil Res Pract. 2018 Jun 19;2018:3521271. doi: 10.1155/2018/3521271 (PMC6029464; doi:10.1155/2018/3521271)
Supplement: Supplementary Materials — Category_calculation.csv and Activity_data_time_points.csv is file containing data sets. [file 3521271.f1.zip]

Archive with 2 entries (2 files):
- Activity_data_time_points.csv
- Category_calculation.csv
