# Supplementary material for: Validation of Activity Tracking Procedures in Elderly Patients after Operative Treatment of Proximal Femur Fractures
Source: Rehabil Res Pract. 2018 Jun 19;2018:3521271. doi: 10.1155/2018/3521271 (PMC6029464; doi:10.1155/2018/3521271)
Supplement: Supplementary Materials — Category_calculation.csv and Activity_data_time_points.csv is file containing data sets. [file 3521271.f1.zip › Activity_data_time_points.csv]

Step-TP-1	Step-TP-2	No-TP-1	Low-TP-1	Middle-TP-1	High-TP-1	Active-Min-TP-1	Very-Active-Min-TP-1	No-TP-2	Low-TP-2	Middle-TP-2	High-TP-2	Active-Min-TP-2	Very-Active-Min-TP-2	Barthel-TP-1	Barthel-TP-2	EQ5D-TP-1	EQ5D-TP-2
357	4.690	62,15	10,42	21,53	5,90	254,50	60,00	57,64	5,32	16,44	20,60	288,50	229,33	45	65	0,138	0,660
		66,32	7,99	17,71	7,99	248,50	50,00	65,74	9,03	17,71	7,52	245,33	65,83	30	55	0,138	0,660
24	161	73,61	11,11	13,19	2,08	160,00	54,00	63,54	5,56	19,44	11,46	291,50	116,50	30	40	0,138	0,592
562	1.268	88,19	2,78	9,03	0,00	72,00	30,00	88,89	3,47	6,94	0,69	64,00	41,00	30	65	0,660	0,723
26	136	56,25	11,81	22,22	9,72	305,00	64,00	62,50	9,72	14,58	13,19	306,00	133,00	45	70	0,326	0,723
														35	60	0,722	0,722
62	100	78,47	7,64	11,11	2,78	147,00	24,00	70,83	4,86	13,89	10,42	240,00	78,00	25	50	0,162	0,592
		71,30	6,71	14,35	7,64	215,00	70,33	59,03	11,11	20,14	9,72	306,00	86,00	30	65	-0,003	0,660
276	641	55,56	8,33	22,92	13,19	332,00	96,00	66,67	6,48	17,13	9,72	263,33	96,67	30	65	0,564	0,654
26	10	84,26	6,02	7,18	2,55	103,67	33,67	67,71	12,50	15,28	4,51	199,00	48,00	30	25	0,230	0,435
		38,19	9,03	29,17	23,61	511,00	142,00							60	70	0,564	0,722
36	124	67,36	6,71	20,14	5,79	230,33	70,33	46,76	18,06	24,77	10,42	356,33	95,00	60	60	0,660	0,660
