# Supplementary material for: Validation of Activity Tracking Procedures in Elderly Patients after Operative Treatment of Proximal Femur Fractures
Source: Rehabil Res Pract. 2018 Jun 19;2018:3521271. doi: 10.1155/2018/3521271 (PMC6029464; doi:10.1155/2018/3521271)
Supplement: Supplementary Materials — Category_calculation.csv and Activity_data_time_points.csv is file containing data sets. [file 3521271.f1.zip › Category_calculation.csv]

SVM	Level_of_Activity	LoA_code	Proc_cut_05
0,003373	rest	1	2,5
0,004728	low	2	16,1
0,004789	medium	3	37,3
0,017793	high	4	100,0
0,005826	medium	3	69,4
0,017661	high	4	100,0
0,011066	medium	3	88,0
0,012086	high	4	92,3
0,003950	low	2	0,0
0,004488	medium	3	26,7
0,003085	medium	3	9,2
0,025614	high	4	76,2
0,018152	high	4	66,7
0,012436	high	4	67,7
0,008149	medium	3	32,4
0,002932	rest	1	0,8
0,003052	low	2	4,8
0,003548	medium	3	11,7
0,006486333	high	4	75,0
0,002755	low	2	0,0
0,008659	high	4	93,3
0,022559	high	4	48,3
0,030579	high	4	90,0
0,006301931	low	2	80,5
0,017819	high	4	100
0,005576	low	2	60,2
0,004213	rest	1	15,7
0,004743	low	2	35,2
0,008274	high	4	72,2
0,003836	low	2	15,0
0,006913	high	4	75,0
0,004209	low	2	15,0
0,002711	rest	1	3
0,003892	low	2	12,8
0,010743	high	4	68,8
0,004186	low	2	18,5
0,008221	medium	3	73,3
0,003746	rest	1	0,4
0,006224	medium	3	37,5
0,016043	high	4	62,5
0,005199	medium	3	33,5
0,005387	medium	3	37,0
0,007637	medium	3	50,0
0,006736	medium	3	37,5
0,017399	high	4	90,9
0,002876	rest	1	0,7
0,009453	high	4	60,9
0,024119188	high	4	68,8
0,005406097	low	2	51,6
0,010428455	high	4	81,8
0,008560885	medium	3	65,4
0,011628455	high	4	72,7
0,002988537	rest	1	5,0
0,015530	high	4	81,8
0,009275	high	4	50,0
0,002898	rest	1	4,1
0,012203	high	4	81,8
0,019558	medium	3	57,1
0,005847	rest	1	35,0
0,009802	low	2	67,6
0,003708	low	2	11,4
0,002868	rest	1	0,8
0,010668	medium	3	36,4
0,002906	rest	1	0,0
0,010628	medium	3	46,2
0,027613	high	4	81,8
0,012627	medium	3	50,0
0,002909	rest	1	0,0
0,008893	medium	3	31,3
0,019031	high	4	90,0
